# Supplementary material for: Frasier Syndrome: A 15-Year-Old Phenotypically Female Adolescent Presenting with Delayed Puberty and Nephropathy
Source: MDPI journal article supplement (doi:10.3390/children10030577), 2023-03-17
Supplement: s1 [file s1]

**Supplementary Table 1. Clinical characteristics of FS patients with the IVS9 +4C>T mutation in the WT1 gene**

| Chromosome karyotype | External genitalia | Age of diagnosis | Initial symptom (age)    | Renal biopsy | ESRD | delayed secondary sex characteristics* | Urological/genital tumors  | Reference # |
|----------------------|--------------------|------------------|--------------------------|--------------|------|----------------------------------------|----------------------------|-------------|
| 46,XY                | F                  | 15y              | Delayed puberty(12y)     | FSGS         | 16y  | Delayed puberty(12y)                   | -                          | #           |
| 46,XY                | F                  | 14m              | Proteinuria(17w)         | FSGS         | -    | -                                      | -                          | [1]         |
| 46XX                 | F                  | NA               | SNRS(12y)                | MPGN         | 13y  | -                                      | -                          | [1]         |
| 46,XY                | F                  | 8y               | Proteinuria(3y)          | FSGS         | -    | -                                      | gonadoblastoma             | [2]         |
| 46,XY                | F                  | 16y              | Proteinuria(NA)          | FSGS         | -    | Primary amenorrhea(16y)                | -                          | [3]         |
| 46,XY                | M                  | 29y              | HBP(29y)                 | NA           | 29y  |                                        | Sertoli cell tumor         | [4]         |
| 46,XY                | M                  | 6.3y             | Edema(6.3y)              | -            | 6.3y | -                                      | Seminoma                   | [5]         |
| 46,XY                | F                  | 5y               | Proteinuria(2y)          | FSGS         | -    | -                                      | -                          | [6]         |
| 46,XY                | F                  | 13y              | peritoneal syndrome(13y) | FSGS         | 14y  | -                                      | gonadoblastoma bilaterally | [7]         |
| 46,XY                | F                  | 17.3y            | CKD(NA)                  | NA           | 11y  | Primary amenorrhea (17.3)              | gonadoblastoma             | [8]         |
| 46,XY                | F                  | 18y              | CKD(NA)                  | NA           | 18y  | Primary amenorrhea (15y)               | -                          | [8]         |
| 46,XY                | F                  | 3y               | proteinuria              | FSGS         | 3y   | -                                      | -                          | [9]         |
| 46,XY                | F                  | 15y              | Proteinuria(11y)         | NA           | 11y  | Delayed puberty(15y)                   | germinoma                  | [10]        |
| 46,XY                | F                  | 19y              | Proteinuria(3y)          | MPGN         | -    | Delayed puberty(12y)                   | -                          | [11]        |
| 46,XY                | F                  | 19y              | Proteinuria(3y)          | MPGN         | 20y  | Delayed puberty (12y)                  | -                          | [11]        |
| 46,XY                | M                  | 22y              | Proteinuria(13y)         | NA           | 18y  | -                                      | Gonadoblastoma             | [12]        |
| 46,XY                | F                  | 13y              | NS(9y)                   | FSGS         | 17y  | Delayed puberty (13y)                  | -                          | [13]        |
| 46,XY                | F                  | 11Y              | SNRS(22m)                | FSGS         | 8y   | -                                      | -                          | [14]        |
| 46,XY                | F                  | 17Y              | Proteinuria(10y)         | FSGS         | 17y  | -                                      | Gonadoblastoma             | [15]        |
| 46,XY                | F                  | 18y              | Proteinuria(4y)          | FSGS         | -    | Primary amenorrhea (16y)               | -                          | [16]        |
| 46,XY                | F                  | 16y              | Proteinuria(4y)          | FSGS         | -    | -                                      | -                          | [16]        |
| 46,XY                | F                  | 12y              | Proteinuria(6y)          | NA           | -    | Delayed puberty(12y)                   | Wilms' tumor               | [17]        |

|       |   |     |                  |                                     |     |                      |                          |      |
|-------|---|-----|------------------|-------------------------------------|-----|----------------------|--------------------------|------|
| 46,XY | F | 17y | proteinuria(7m)  | FSGS                                | 12y | Delayed puberty(17y) | dysgerminom              | [17] |
| 46,XY | F | 18y | Proteinuria(3y)  | FSGS                                | -   | -                    | -                        | [18] |
| 46,XY | F | 18y | Proteinuria(3y)  | FSGS                                | -   | -                    | -                        | [18] |
| 46,XY | F | 19  | Proteinuria(5y)  | FSGS                                | 16y | -                    | Gonadoblastoma           | [18] |
| 46,XX | F | 1y  | Proteinuria (4m) | DMS                                 | 1y  | -                    | -                        | [19] |
| 46,XY | F | NA  | Proteinuria (6y) | FSGS                                | 9y  | -                    | myofibroblastic<br>tumor | [20] |
| 46,XY | F | NA  | Proteinuria (2y) | unspecific<br>glomerular<br>changes | 23y | -                    | Gonadoblastoma           | [20] |

\* delayed secondary sex characteristics: primary amenorrhea and/or delayed puberty; # the patient in this case

F: female; M: male; NA: not available; MPGN: mesangial proliferative glomerulonephritis; DMS: diffuse mesangial sclerosis.

## References

1. Anderson, E.; Aldridge, M.; Turner, R.; Harraway, J.; McManus, S.; Stewart, A.; Borzi, P.; Trnka, P.; Burke, J.; Coman, D. WT1 complete gonadal dysgenesis with membranoproliferative glomerulonephritis: case series and literature review. *Pediatric Nephrology (Berlin, Germany)* **2022**, *37*, 2369-2374, doi:10.1007/s00467-022-05421-8.
2. Matsuoka, D.; Noda, S.; Kamiya, M.; Hidaka, Y.; Shimojo, H.; Yamada, Y.; Miyamoto, T.; Nozu, K.; Iijima, K.; Tsukaguchi, H. Immune-complex glomerulonephritis with a membranoproliferative pattern in Frasier syndrome: a case report and review of the literature. *BMC Nephrology* **2020**, *21*, 362, doi:10.1186/s12882-020-02007-0.
3. Merhi, Z.; Pollack, S.E. Pituitary origin of persistently elevated human chorionic gonadotropin in a patient with gonadal failure. *Fertility and Sterility* **2013**, *99*, 293-296, doi:10.1016/j.fertnstert.2012.08.051.
4. Kitsiou-Tzeli, S.; Deligiorgi, M.; Malaktari-Skarantavou, S.; Vlachopoulos, C.; Megremis, S.; Fylaktou, I.; Traeger-Synodinos, J.; Kanaka-Gantenbein, C.; Stefanadis, C.; Kanavakis, E. Sertoli cell tumor and gonadoblastoma in an untreated 29-year-old 46,XY phenotypic male with Frasier syndrome carrying a WT1 IVS9+4C>T mutation. *Hormones (Athens)* **2012**, *11*, 361-367.
5. Yang, Y.; Feng, D.; Huang, J.; Nie, X.; Yu, Z. A child with isolated nephrotic syndrome and WT1 mutation presenting as a 46, XY phenotypic male. *Eur J Pediatr* **2013**, *172*, 127-129, doi:10.1007/s00431-012-1770-0.
6. Sinha, A.; Sharma, S.; Gulati, A.; Sharma, A.; Agarwala, S.; Hari, P.; Bagga, A. Frasier syndrome: early gonadoblastoma and cyclosporine responsiveness. *Pediatric Nephrology (Berlin, Germany)* **2010**, *25*, 2171-2174, doi:10.1007/s00467-010-1518-x.

7. Mestrallet, G.; Bertholet-Thomas, A.; Ranchin, B.; Bouvier, R.; Frappaz, D.; Cochat, P. Recurrence of a dysgerminoma in Frasier syndrome. *Pediatr Transplant* **2011**, *15*, e53-e55, doi:10.1111/j.1399-3046.2010.01273.x.
8. Andrade, J.G.R.d.; Guaragna, M.S.; Soardi, F.C.; Guerra-Júnior, G.; Mello, M.P.d.; Maciel-Guerra, A.T. Clinical and genetic findings of five patients with WT1-related disorders. *Arq Bras Endocrinol Metabol* **2008**, *52*, 1236-1243.
9. Aucella, F.; Bisceglia, L.; De Bonis, P.; Gigante, M.; Caridi, G.; Barbano, G.; Mattioli, G.; Perfumo, F.; Gesualdo, L.; Ghiggeri, G.M. WT1 mutations in nephrotic syndrome revisited. High prevalence in young girls, associations and renal phenotypes. *Pediatric Nephrology (Berlin, Germany)* **2006**, *21*, 1393-1398.
10. Chan, W.K.Y.; To, K.F.; But, W.M.; Lee, K.W. Frasier syndrome: a rare cause of delayed puberty. *Hong Kong Med J* **2006**, *12*, 225-227.
11. Ito, S.-i.; Hataya, H.; Ikeda, M.; Takata, A.; Kikuchi, H.; Hata, J.-i.; Morikawa, Y.; Kawamura, S.; Honda, M. Alport syndrome-like basement membrane changes in Frasier syndrome: an electron microscopy study. *Am J Kidney Dis* **2003**, *41*, 1110-1115.
12. Melo, K.F.S.; Martin, R.M.; Costa, E.M.F.; Carvalho, F.M.; Jorge, A.A.; Arnhold, I.J.P.; Mendonca, B.B. An unusual phenotype of Frasier syndrome due to IVS9 +4C>T mutation in the WT1 gene: predominantly male ambiguous genitalia and absence of gonadal dysgenesis. *The Journal of Clinical Endocrinology and Metabolism* **2002**, *87*, 2500-2505.
13. Bönte, A.; Schröder, W.; Denamur, E.; Querfeld, U. Absent pubertal development in a child with chronic renal failure: the case of Frasier syndrome. *Nephrol Dial Transplant* **2000**, *15*, 1688-1690.
14. Denamur, E.; Bocquet, N.; Baudouin, V.; Da Silva, F.; Veitia, R.; Peuchmaur, M.; Elion, J.; Gubler, M.C.; Fellous, M.; Niaudet, P.; et al. WT1 splice-site mutations are rarely associated with primary steroid-resistant focal and segmental glomerulosclerosis. *Kidney International* **2000**, *57*, 1868-1872.
15. Okuhara, K.; Tajima, S.; Nakae, J.; Sasaki, S.; Tochimaru, H.; Abe, S.; Fujieda, K. A Japanese case with Frasier syndrome caused by the splice junction mutation of WT1 gene. *Endocr J* **1999**, *46*, 639-642.
16. Demmer, L.; Primack, W.; Loik, V.; Brown, R.; Therville, N.; McElreavey, K. Frasier syndrome: a cause of focal segmental glomerulosclerosis in a 46,XX female. *J Am Soc Nephrol* **1999**, *10*, 2215-2218.
17. Barbosa, A.S.; Hadjiathanasiou, C.G.; Theodoridis, C.; Papathanasiou, A.; Tar, A.; Merksz, M.; Györvári, B.; Sultan, C.; Dumas, R.; Jaubert, F.; et al. The same mutation affecting the splicing of WT1 gene is present on Frasier syndrome patients with or without Wilms' tumor. *Hum Mutat* **1999**, *13*, 146-153.
18. Kikuchi, H.; Takata, A.; Akasaka, Y.; Fukuzawa, R.; Yoneyama, H.; Kurosawa, Y.; Honda, M.; Kamiyama, Y.; Hata, J. Do intronic mutations affecting splicing of WT1 exon 9 cause Frasier syndrome? *J Med Genet* **1998**, *35*, 45-48.
19. Jeanpierre, C.; Denamur, E.; Henry, I.; Cabanis, M.O.; Luce, S.; Cécille, A.; Elion, J.; Peuchmaur, M.; Loirat, C.; Niaudet, P.; et al. Identification of

constitutional WT1 mutations, in patients with isolated diffuse mesangial sclerosis, and analysis of genotype/phenotype correlations by use of a computerized mutation database. *Am J Hum Genet* **1998**, 62, 824-833.

20. Barbaux, S.; Niaudet, P.; Gubler, M.C.; Grünfeld, J.P.; Jaubert, F.; Kuttann, F.; Fékété, C.N.; Souleyreau-Therville, N.; Thibaud, E.; Fellous, M.; et al. Donor splice-site mutations in WT1 are responsible for Frasier syndrome. *Nat Genet* **1997**, 17, 467-470.
